# Supplementary material for: Coaxial wet-spun yarn supercapacitors for high-energy density and safe wearable electronics
Source: PubMed Central journal article supplement — Nat Commun. 2014 May 2;5:3754. doi: 10.1038/ncomms4754 (PMC4024741; doi:10.1038/ncomms4754), 2014-05-02
Supplement: ncomms4754-s1.pdf [file ncomms4754-s1.pdf]

# Supplementary Information

## Supplementary Figures

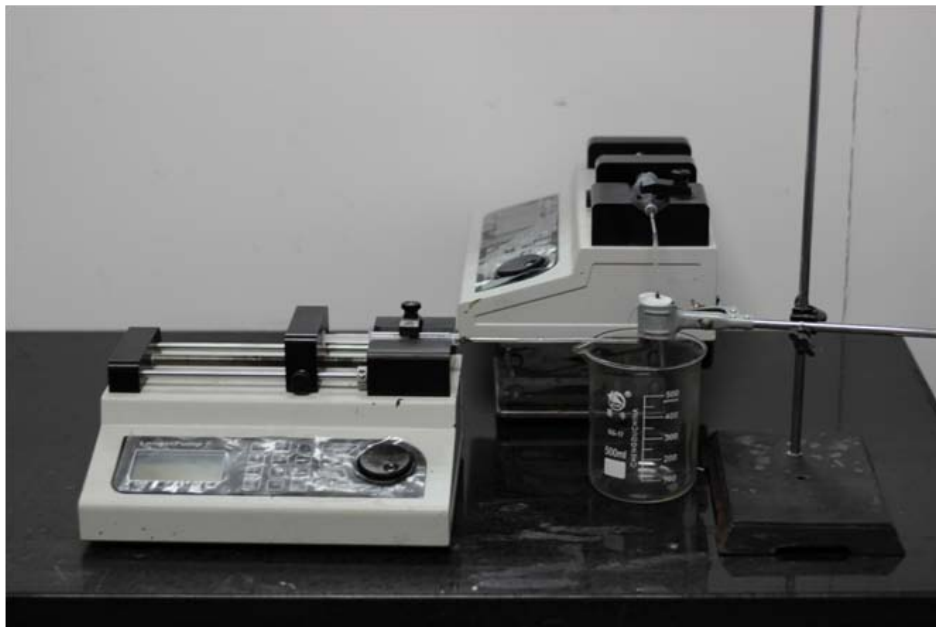

**Supplementary Figure 1** Photograph of experimental apparatus for coaxial spinning.

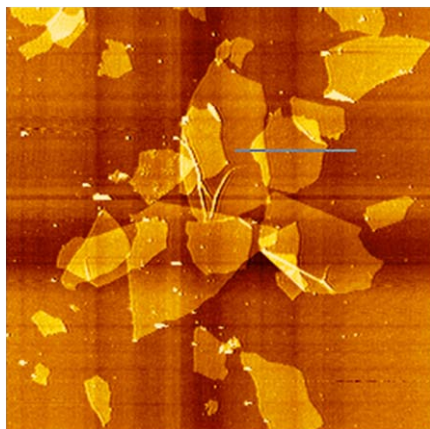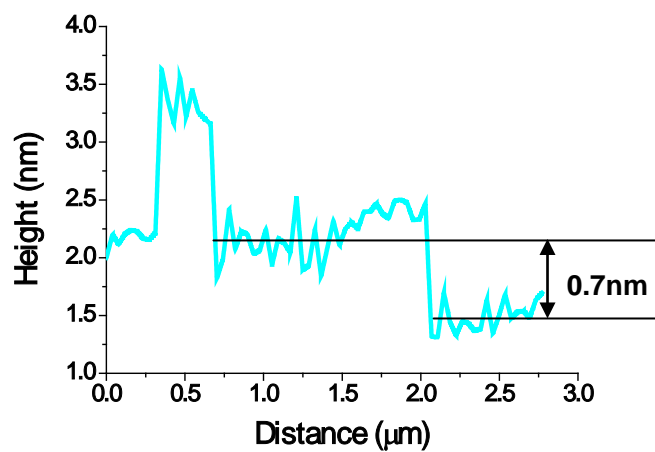

**Supplementary Figure 2** AFM images of GO.

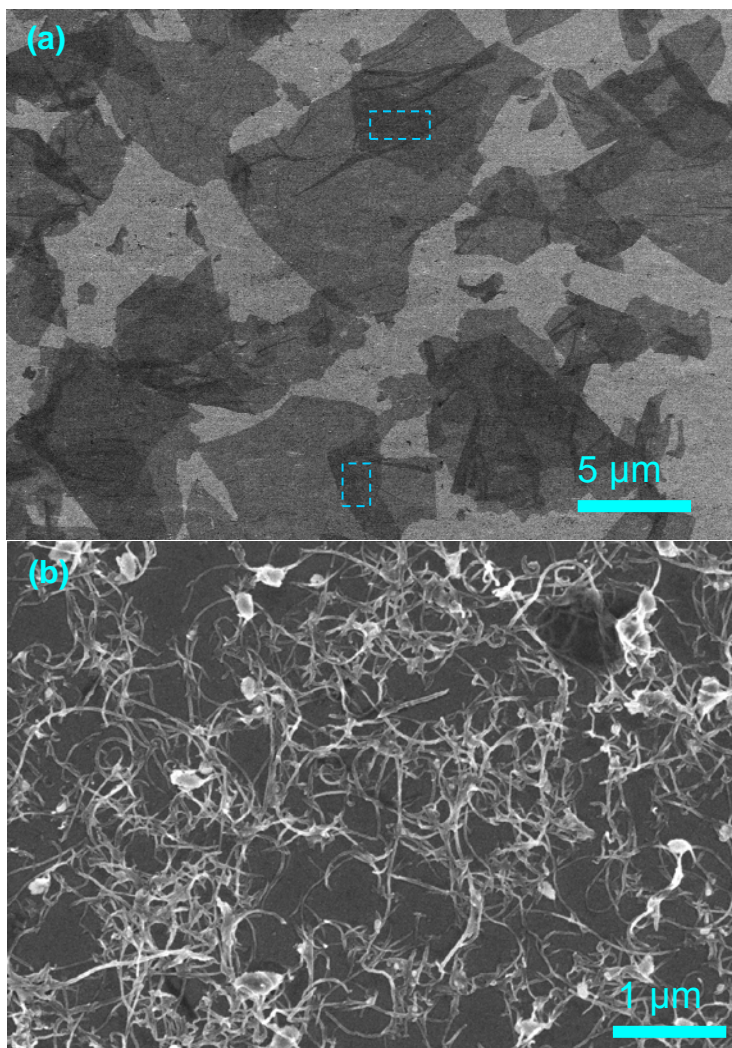

**Supplementary Figure 3** SEM images of GO (a) and CNT (b).

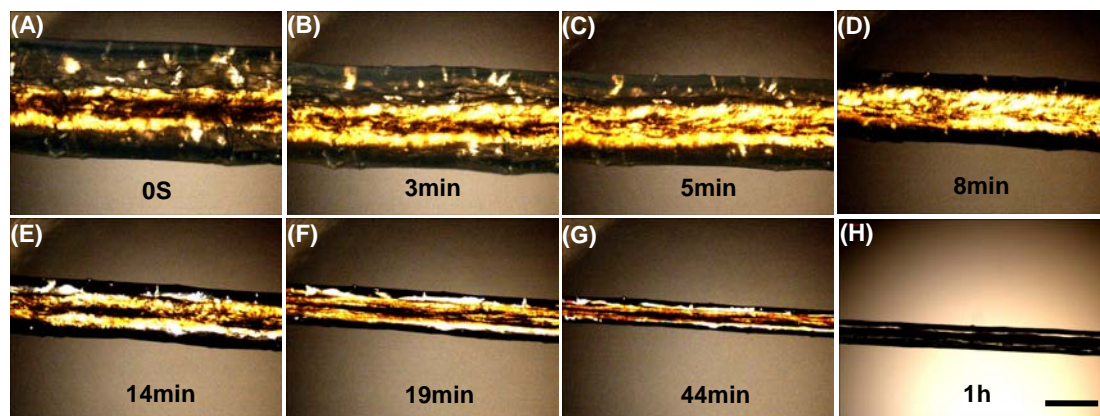

**Supplementary Figure 4** POM images of GO@CMC coaxial fibre with different solidification time after drawing from the washing bath. (The scale bar in H is 100 μm)

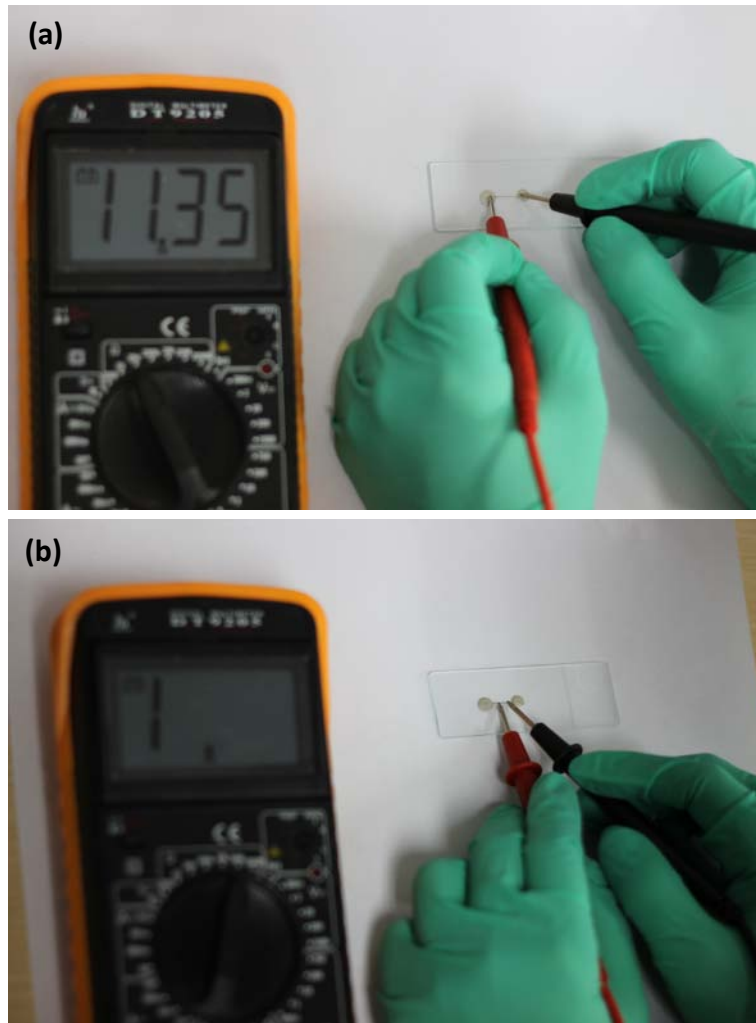

**Supplementary Figure 5** Resistance measurement of coaxial fibres (Measured from the ends of core, the coaxial fibre is electrically conductive with resistance of 11.35 k $\Omega$ . Measured from the side face, the coaxial fibre is insulative and the resistance is out of range.)

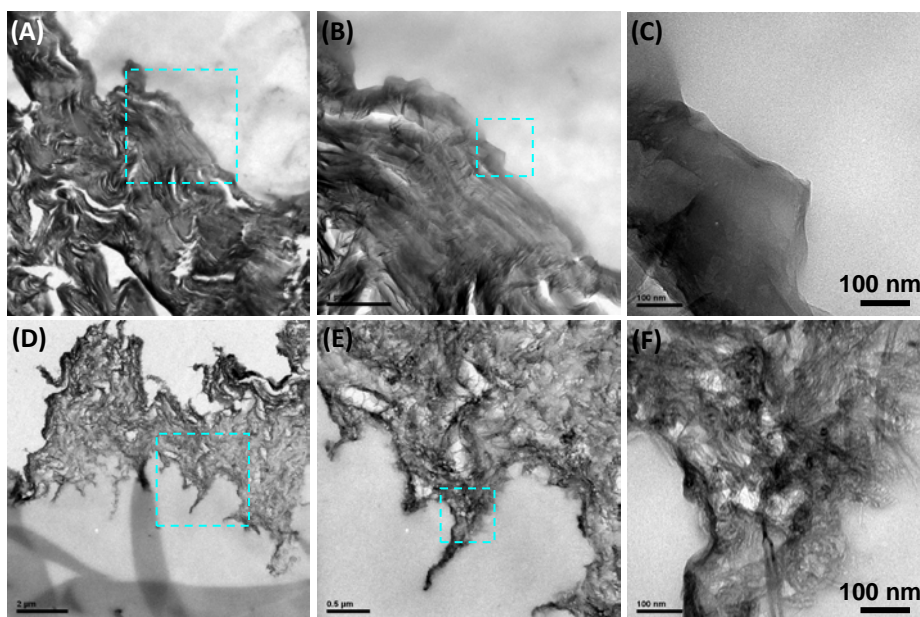

**Supplementary Figure 6** TEM images of GO@CMC (A-C) and CNT@CMC (D-F) coaxial fibre.

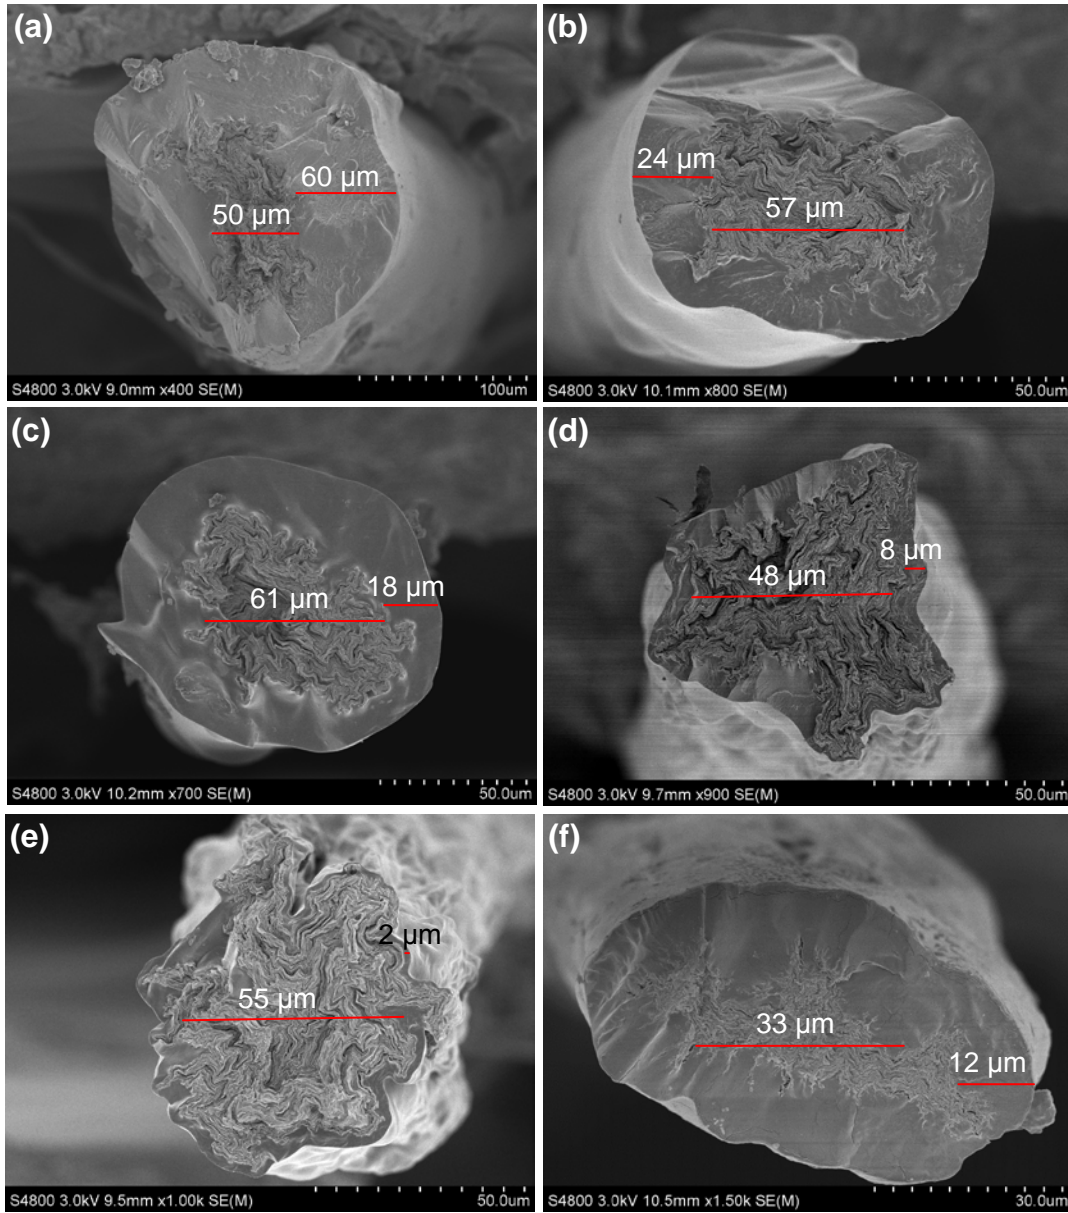

**Supplementary Figure 7** SEM images of GO@CMC coaxial fibre with different diameters of core and thickness of sheath.

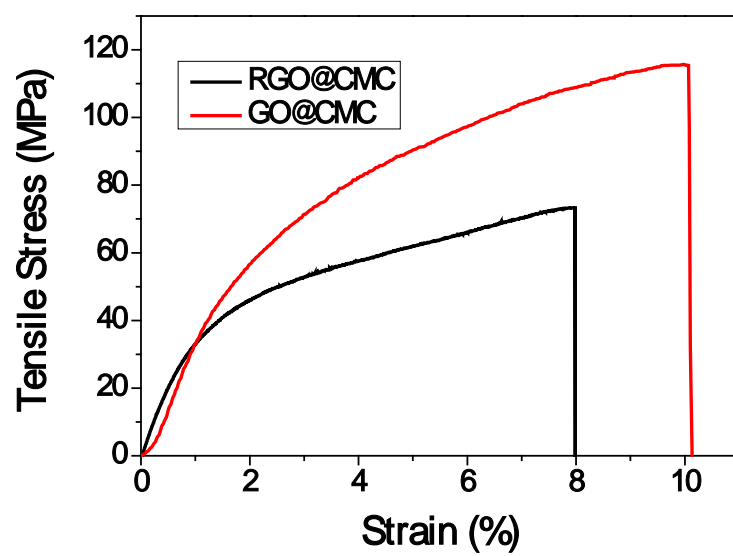

**Supplementary Figure 8** Typical stress-strain curves of GO@CMC and RGO@CMC coaxial fibre.



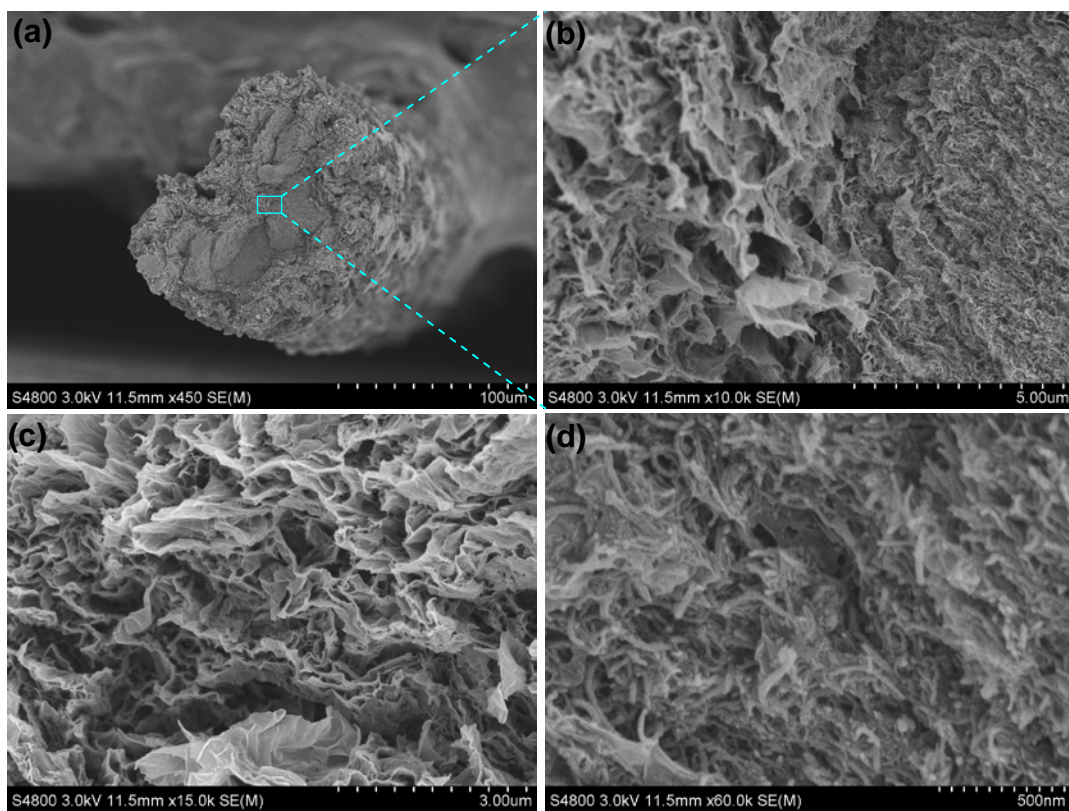

**Supplementary Figure 9** SEM images of all-carbon RGO+CNT@RGO coaxial fibre, c and d are the magnified images of the shell and core, respectively.

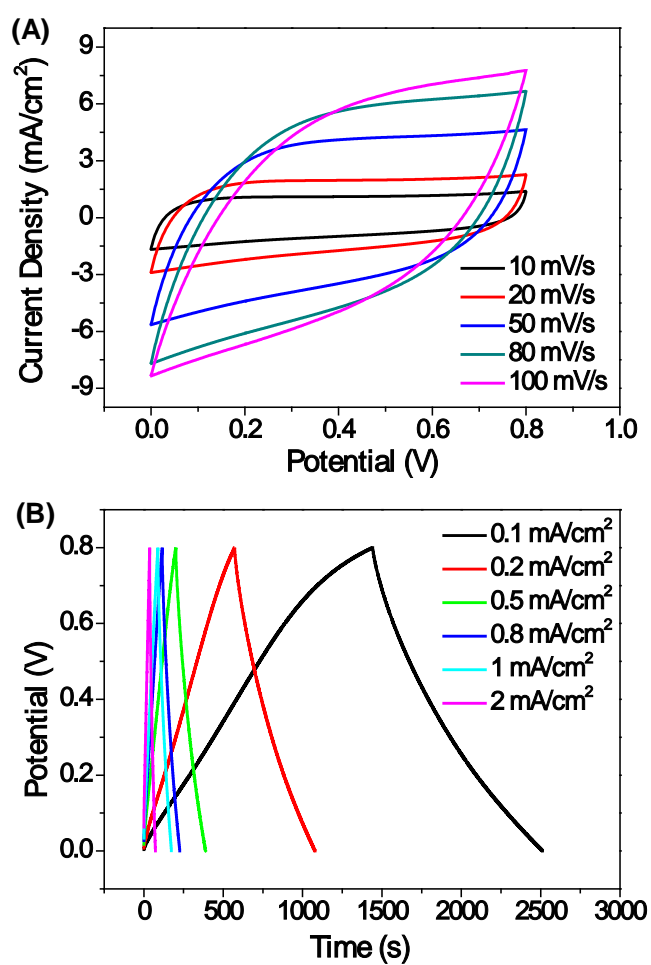

**Supplementary Figure 10** CV (A) and GCD (B) curves of RGO+CNT@CMC YSCs with liquid electrolyte of 1 M H<sub>2</sub>SO<sub>4</sub> aqueous solution.

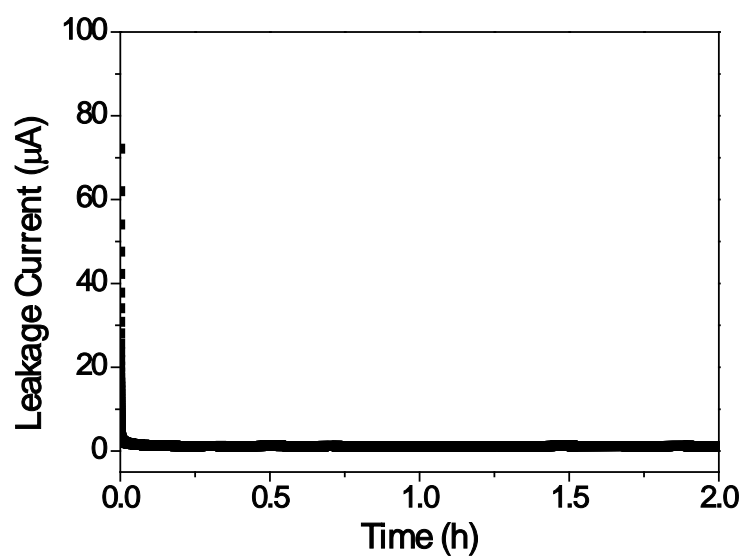

**Supplementary Figure 11** Leakage current curves of the solid-state RGO+CNT@CMC YSCs.

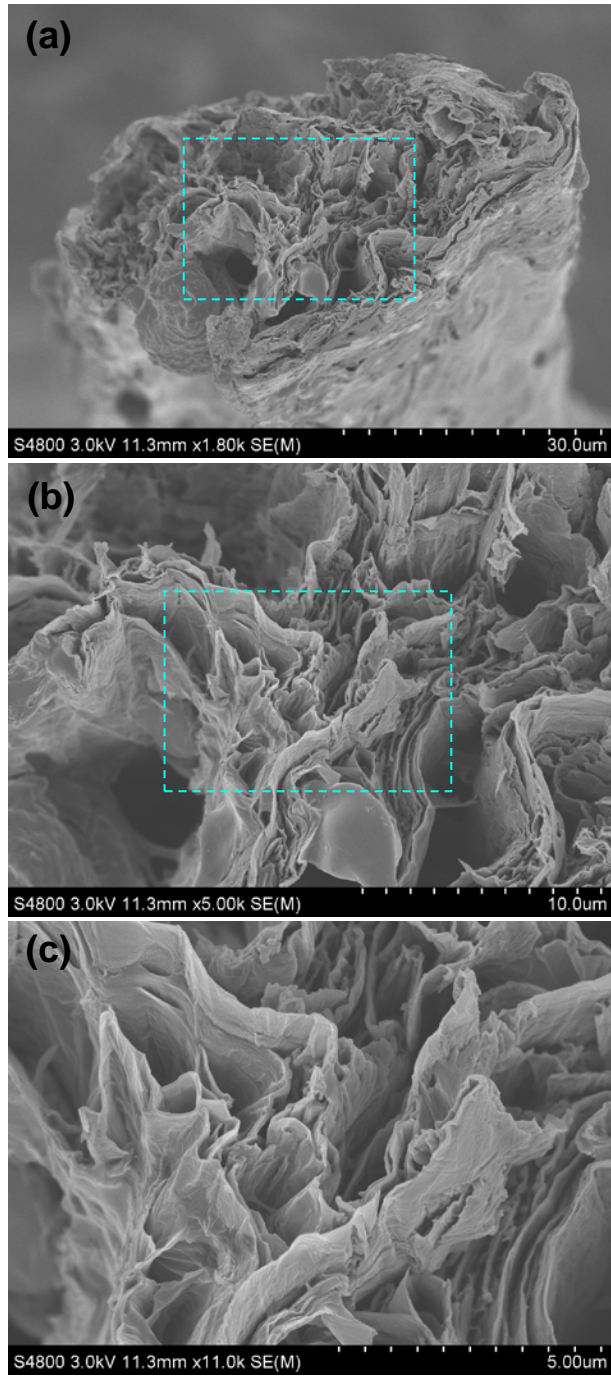

**Supplementary Figure 12** SEM images of RGO fibre.

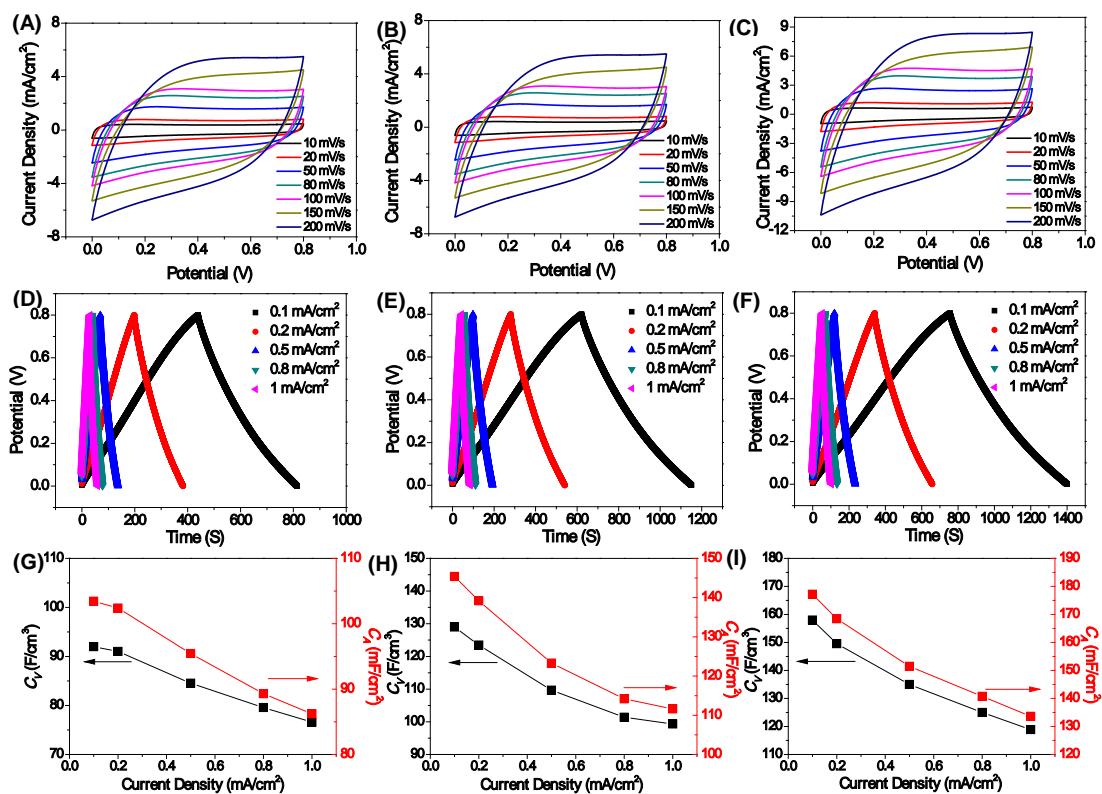

**Supplementary Figure 13** CV, GCD and rate capability curves of RGO+CNT@CMC fibres with CMC thickness of 2 (A, D, G), 10 (B, E, H) and 25  $\mu\text{m}$  (C, F, I).

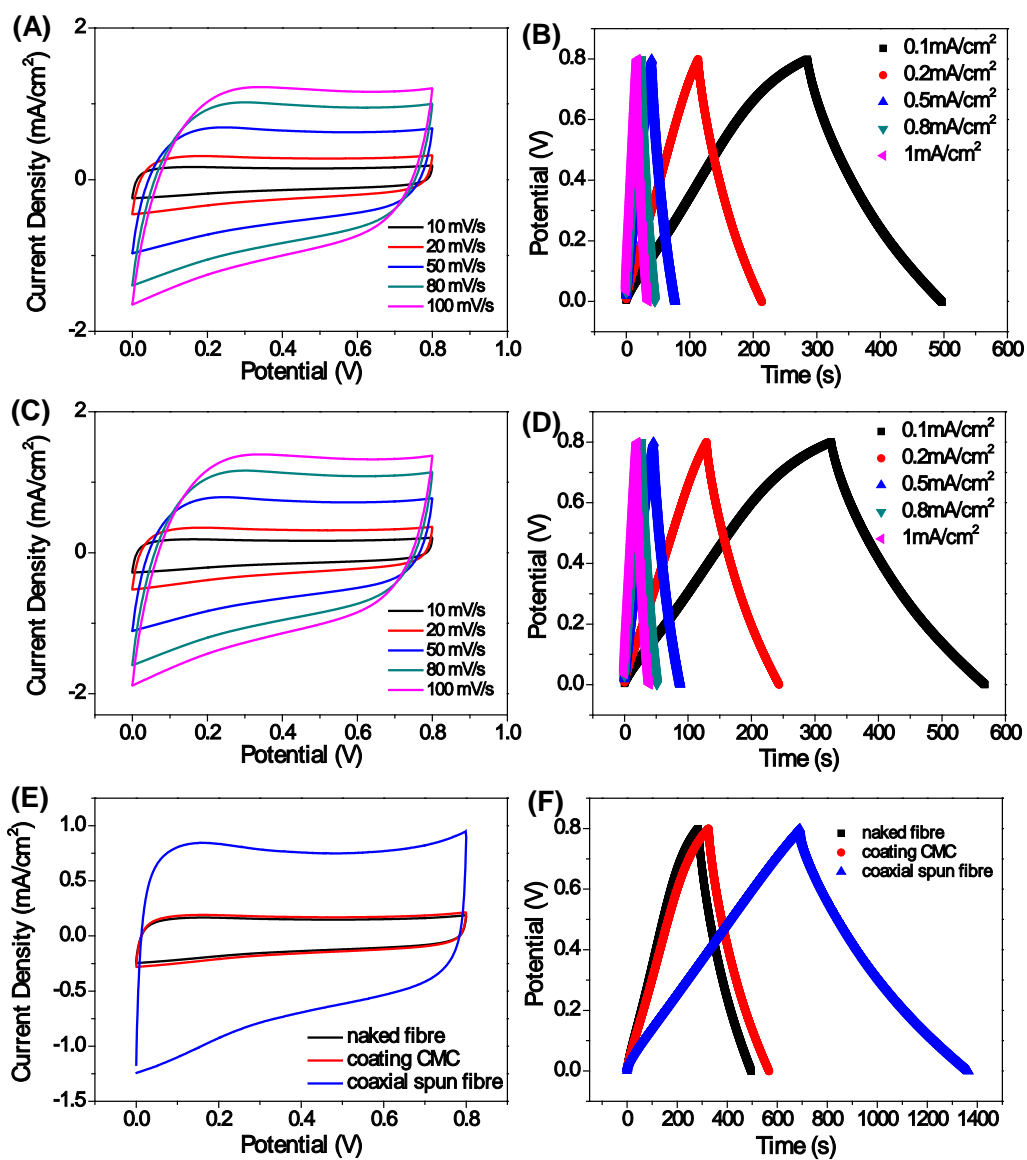

**Supplementary Figure 14** CV and GCD curves of dry RGO+CNT fibres before (A, B) and after (C, D) coating a CMC layer, and the comparison with coaxial wet-spun fibres at scan rate of 10 mV and current density of 0.1mA/cm<sup>2</sup>.
